1 **Potential Impacts of Mass Nutritional Supplementation on Measles Dynamics: A Simulation**

2 **Study**

3 Navideh Noori<sup>1,\*</sup>, Laura A. Skrip<sup>2</sup>, Assaf P. Oron<sup>3</sup>, Kevin A. McCarthy<sup>1</sup>, Josh L. Proctor<sup>1</sup>, Guillaume

4 Chabot-Couture<sup>1</sup>, Benjamin M. Althouse<sup>4,5</sup>, Kevin P.Q. Phelan<sup>6,§</sup>, and Indi Trehan<sup>7,§</sup>

5 <sup>1</sup> Institute for Disease Modeling, Global Health Division, Bill and Melinda Gates Foundation

6 <sup>2</sup> School of Public Health, University of Liberia, 1000 Monrovia, 10 Liberia

7 <sup>3</sup> Institute for Health Metrics and Evaluation, University of Washington, Seattle, WA, USA

8 <sup>4</sup> Information School, University of Washington, Seattle, WA, 98104, USA

9 <sup>5</sup> Department of Biology, New Mexico State University, Las Cruces, NM, 88003, USA

10 <sup>6</sup> The Alliance for International Medical Action (ALIMA), Paris, 75011, France

11 <sup>7</sup> Department of Pediatrics, Global Health, and Epidemiology, University of Washington, Seattle, WA,  
12 98105, USA

13

14 **Keywords:** wasting, measles, acute malnutrition, food supplementation, vaccination

15 **Abstract word counts:** 257

16 **Text word counts:** 4367

17 **Number of Figures:** 4

---

\* Corresponding author: Navideh Noori; Institute for Disease Modeling, Global Health Division, Bill and Melinda Gates Foundation, 500 5th Ave N, Seattle, WA, 98109, USA, **Email:** [navideh.noori@gatesfoundation.org](mailto:navideh.noori@gatesfoundation.org), **Phone:** +1(425) 528-0569

<sup>§</sup> Kevin P.Q. Phelan and Indi Trehan are joint senior authors.

18 **Number of Tables:** 1

19 **Other information:** Supplementary Information

20

21 **Abstract**

22 The bidirectional interaction between undernutrition and infection can be devastating to child health.  
23 Nutritional deficiencies impair immunity and increase susceptibility to infection. Simultaneously,  
24 infections compound undernutrition by increasing metabolic demand, and impairing nutrient absorption.  
25 Treatment of acute malnutrition (wasting) can reverse some of its deleterious effects and reduce  
26 susceptibility to infectious diseases. Nutrition-specific approaches may be packaged with other  
27 interventions, including immunization, to support overall child health. To understand how mass  
28 nutritional supplementation, treatment of wasting, and vaccination affect the dynamics of a vaccine-  
29 preventable infection, we developed a population-level, compartmental model of measles transmission  
30 stratified by age and nutrition status. We simulated a range of scenarios to assess the potential reductions  
31 in measles infection and mortality associated with targeted therapeutic feeding for children who are  
32 wasted and with a mass supplementation intervention. Nutrition interventions were assumed to increase  
33 engagement with the health sector, leading to increased vaccination rates. We found that the  
34 combination of wasting treatment and mass supplementation coverage followed by an increase in  
35 vaccination coverage of non-wasted children from a baseline of 75% to 85%, leads to 34-57% and 65-77%  
36 reduction in measles infection and mortality and 56-60% reduction in overall mortality among wasted  
37 children, compared with the wasting treatment alone. Our work highlights the synergistic benefits that  
38 may be achieved by leveraging mass nutritional supplementation as a touch point with the health system,  
39 to increase rates of vaccination and improve child survival beyond what would be expected from the  
40 additive benefits of each intervention.

41

## 42 **Introduction**

43       Undernutrition and infection interact in a bidirectional manner. Both micronutrient and macronutrient  
44 deficiencies stunt a child's growth, impair immunity, increase susceptibility to infection, and worsen  
45 outcomes from common infectious diseases.<sup>1</sup> The risk of adverse outcomes from infection is correlated  
46 with the degree of undernutrition; concurrently, infection contributes to undernutrition by reducing a  
47 child's ability to consume food, by contributing to nutrient malabsorption, and by increasing metabolic  
48 demand.<sup>2-4</sup> As an example, a higher cumulative burden of diarrhea during the first two years of life  
49 increases the risk of stunting at 24 months of age.<sup>5</sup> Improving the baseline nutritional status of children  
50 and providing treatment for acute malnutrition (wasting) lowers the negative impacts of infections on  
51 growth by strengthening children's immune systems, preventing poor appetite, compensating for  
52 malabsorption, and favoring the growth of beneficial gut microorganisms.<sup>2,6</sup>

53       Undernutrition can lead to long-lasting immune deficits, rendering undernourished children at a  
54 significantly increased risk of respiratory infections, diarrhea, malaria, and measles.<sup>3, 7-9</sup> Even seemingly  
55 mild manifestations of these common infectious diseases can have long-term effects on children's physical  
56 and cognitive development.<sup>10</sup> Identifying patterns of association between undernutrition and infection are  
57 important to the clinical and public health efforts in reducing childhood morbidity and mortality.<sup>1</sup> The  
58 bidirectional relationship between the two events has been well-documented, and its importance  
59 recognized for decades.<sup>4,11</sup> Few studies, though, have explored the impact of undernutrition on the  
60 transmission dynamics of infectious diseases. Among these, there has been investigation into the effect  
61 of undernutrition, or specific nutritional therapies, on transmission of tuberculosis<sup>12</sup> and cholera,<sup>13</sup>  
62 emphasizing the need to address nutrition to reduce the burden of the infection. There are also animal  
63 models of infection and undernutrition that show infection can cause undernutrition; specifically,  
64 weanling undernutrition exacerbates infection and mucosal disruption,<sup>14-17</sup> and increases the intensity of

65 infection in neonatal mice, as assessed by stool shedding, by 1-4 orders of magnitude.<sup>15</sup>

66 Undernutrition is a primary contributor to death in 44.8% of childhood fatalities from measles.<sup>18</sup>  
67 Malnourished children are more likely to develop complications of measles and have a higher case-fatality  
68 ratio,<sup>19</sup> while measles infection can in turn worsen the nutritional status of children. Koster et al.<sup>20</sup> found  
69 that measles had an adverse impact on both mortality and the nutritional status of surviving children. In  
70 their prospective study in Bangladesh, children 7-23 months of age experienced a persistent nutritional  
71 deficit of about 10% after measles infection followed by prolonged diarrhea. Another study in an urban  
72 settlement in Guinea-Bissau also found a negative impact of measles on the nutritional status of children  
73 aged 9-35 months old.<sup>21</sup> Several studies have shown that measles was a precipitating cause of  
74 kwashiorkor,<sup>22-24</sup> and that there have been reports of a reduction in the incidence of kwashiorkor  
75 following measles vaccine campaigns.<sup>23</sup>

76 Interventions focused on treating or preventing undernutrition often rely upon increasing the  
77 engagement of mothers and children with the health sector. Intentionally packaging nutrition-specific  
78 care with routine immunization could lead to enhanced effectiveness in reducing undernutrition but also  
79 improve prevention efforts against infectious disease. In fact, nutritional commodities may be perceived  
80 as an incentive to draw patients to health centers where other services may be offered. Previous work  
81 has shown that an incentive as simple as a bag of lentils for each immunization visit, has large positive  
82 impacts on the uptake of immunization services in resource poor areas.<sup>25</sup> In addition, vaccination uptake  
83 can enhance long-term nutrition outcomes, and targeted vaccination of children with poor socio-  
84 demographic characteristics can improve their overall nutrition status.<sup>26</sup>

85 We developed a population-level, dynamic model of measles transmission stratified by nutrition status  
86 to understand how nutrition-based interventions and vaccination collectively affect measles infection and  
87 mortality. In particular, we modeled two scenarios. In the first, wasted children received treatment with

88 ready-to-use therapeutic food (RUTF). The second included treatment of wasted children, as well as mass  
89 supplementation of all children 6-23 months with small quantity lipid-based nutritional supplements (SQ-  
90 LNS). Lipid-based nutritional supplements (LNS) are a class of ready-to-use food supplements that are  
91 highly nutrient-dense and fortified with vitamins and minerals at levels designed to treat and prevent  
92 acute malnutrition. They range in ration sizes based on their use to either treat or prevent acute  
93 malnutrition, with ready-to-use therapeutic or supplementary foods (RUTF, RUSF) coming in 92- or 100-  
94 gram sachets, medium-quantity LNS in 50 gram sachets, and 20-gram sachets of SQ-LNS for home  
95 fortification of local diets to improve children's complementary feeding. There is strong evidence in  
96 support of implementing mass SQ-LNS supplementation among at-risk children from 6-18 or 23 months,  
97 like those in Niger.<sup>27</sup> Such supplementation has been shown to reduce stunting, wasting, anemia,<sup>28</sup> and  
98 all-cause mortality<sup>29</sup> as well as improve developmental outcomes.<sup>30</sup>

99 We accounted for the nature, timing, and magnitude of interactions between measles and  
100 undernutrition under the different simulated scenarios. Model parameters reflected the situation in  
101 Niger, which was considered to be an appropriate case study due to its high rates of undernutrition and  
102 its persistent measles burden. Undernutrition is the leading cause of infant mortality and morbidity in  
103 Niger.<sup>31</sup> The levels of undernutrition in Niger are among the highest in the world, with 43.5% and 12.5%  
104 of children under 5 years of age being stunted and wasted in 2021, respectively; in the rural Zinder region,  
105 stunting and wasting rates were even higher at 57.4% and 14.3%.<sup>32</sup> These rates are much higher than the  
106 average for the African continent as a whole (30.7% and 6.0% respectively).<sup>33</sup> Outbreaks of vaccine-  
107 preventable diseases like measles are also common in Niger.<sup>34,35</sup>

108 Our modeling scenarios can help us understand the complex connections between undernutrition and  
109 measles that have not been disentangled by previous studies and may help inform approaches to  
110 intervention. There is strong evidence for the positive impact on preventing undernutrition and mortality

111 through mass supplementation with child-adapted foods like SQ-LNS. If our model demonstrates an  
112 additive benefit of increased measles vaccination, it would justify further investment by governments and  
113 donors in scaling-up such programs especially in areas with a simultaneous high burden of malnutrition  
114 and low coverage for measles vaccination.

115

## 116 **Materials and Methods**

117 **Measles-Undernutrition Model with Wasting Treatment (Scenario 1; Treatment).** We developed a  
118 seasonally-forced, deterministic, continuous-time Susceptible-Infectious-Recovered (SIR) model of  
119 measles transmission that accounts for vaccination and for nutritional interventions (Fig. 1). We stratified  
120 the population into children 6-23 months and individuals of all other ages, with children aging from the  
121 former into the latter compartment at a rate  $\alpha$ . We assumed a fixed population of  $N_0 = 100,000$  and  
122 the demographic characteristics of Niger such as birth rate and death rates.<sup>36-38</sup> The population size of  
123 infants up to 6 months is assumed to be  $B = 5000$ . A full list of parameter values is given in Table 1, and  
124 model equations are also given in supplementary material.

125 Initially, children enter the two classes of susceptibility based on their nutritional status: nourished  
126 (non-wasted,  $S_{NO}$ ) or wasted ( $S_{MO}$ ). A proportion,  $\omega$ , of children become wasted during the first 6 months of  
127 life. Some of the wasted children, regardless of their status in the model (susceptible to measles or  
128 vaccinated or recovered), receive therapeutic feeding and move to the non-wasted and treated  
129 compartments. The treatment rate of wasted children was varied to represent the coverage of 5% to 100%,  
130 with 75% effectiveness.. Previous studies have shown that after recovery from wasting, some children  
131 relapse and become wasted post-discharge.<sup>39</sup> We accounted for relapse by moving treated individuals to  
132 different compartments at rate  $\chi$ . The susceptible children who received treatment ( $S_{N1}$ ), were moved to  
133 compartment ( $S_{M1+}$ ). After individuals in  $S_{M1+}$  are treated again for wasting, they move to ( $S_{N2}$ ) and can

134 in turn, move back to ( $S_{M1+}$ ) after experiencing relapse for the second time or more. We assume that  
135 wasted children have a higher mortality rate ( $\mu m$ ) than in other states.

136 A proportion of individuals from all above-mentioned compartments are vaccinated and enter the  
137 vaccinated compartment ( $V$ ). The vaccination coverage is assumed to be 75%, close to Niger national  
138 immunization coverage in 2016.<sup>40</sup> We model single-dose vaccination and assume 95% of vaccinated  
139 children are no longer susceptible to measles infection. We also assumed that vaccination coverage of  
140 wasted children are 10% lower than nourished children ( $uv = 67.5\%$ ), based on the Demographic and  
141 Health Surveys data.<sup>41</sup> The vaccination coverages in the model were defined as rates, and the proportion  
142 vaccinated was calculated from the model outputs. Based on observations of changes in overall care-  
143 seeking as a result of engagement of mothers through nutrition intervention programs,<sup>25</sup> we hypothesize  
144 that receiving therapeutic feeding for wasting among children who are susceptible to measles, increases  
145 the measles vaccine uptake by  $vt$ .

146 Upon contracting measles, non-wasted and wasted individuals enter the infectious compartments ( $I_N$   
147 and  $I_M$ , respectively). Depending on the host age and condition, measles may be fatal. This is presented by  
148 the measles case fatality rate, here defined as probability ( $\sigma$ ). We assume that wasting leads to increased  
149 susceptibility to measles ( $\theta$ ), longer infectious period ( $\eta$ ), and increased measles mortality ( $\phi$ ). In this  
150 work, we assumed that the subsequent wasting event increases susceptibility to measles to the same  
151 degree as the first wasting event ( $\zeta = 0$ ). Individuals who recover from measles move to the recovered  
152 class ( $R$ ). A proportion,  $H$ , of children develop wasting after measles infection.<sup>23</sup> Children who survive from  
153 measles but become wasted post-measles infection move from  $I_N$  to  $R_{NM}$ , and those who stay nourished  
154 move to  $R_{NN}$  class. There is also a chance,  $\rho$ , of mortality due to measles-associated wasting.<sup>24,42</sup> These  
155 parameter values were informed by literature on kwashiorkor specifically, due to a lack of studies on  
156 measles-associated marasmus. We assume that a proportion,  $\delta$ , of wasted children who get infected with

157 measles, eventually recover from wasting and move from  $I_M$  to  $R_{MN}$  upon infection. Those who stayed  
158 wasted, move from  $I_M$  to  $R_{MM}$ . We assumed a proportion of individuals in  $R_{MM}$  experience death due to  
159 measles-associated wasting.

160 We depict the findings as heatmaps displaying measles infections averted across different  
161 combinations of therapeutic feeding rate for children with wasting ( $\tau$ ) and vaccination rate among wasted  
162 children receiving therapeutic feeding ( $ut$ ). We vary these two quantities while fixing values of the  
163 remaining model parameters. The percentage reduction in infections and mortality due to measles among  
164 wasted children aged 6-23 months old, total infections and mortality in the population to measles among  
165 wasted children, and overall mortality among wasted children are the model outcomes. To calculate the  
166 percentage reduction, the sum of number of each outcome over the last year of simulations were  
167 calculated versus the baseline sum ( $\tau = 0.05$  and  $ut = 67.5$ ). We also calculated the rates of infected cases  
168 and measles deaths per 100,000 wasted children and per 100,000 population per year, as well as rate of  
169 overall mortality per 100,000 wasted children.

170

### 171 **Measles-Undernutrition Model with Mass Nutritional Supplementation (Scenario 2; Prevention).**

172 Instead of wasting treatment, we model the effect of community-wide mass nutritional supplementation  
173 on dynamics of measles by assuming that 60% of the population aged 6-23 months (parameter  $MC$ )  
174 receive daily doses of SQ-LNS (20 gr per sachet) at health center, per coverage found in a recent study in  
175 Mali<sup>29</sup> (Table 3) (Fig. S1). We hypothesize that the mass supplementation results in an increase in the first  
176 dose of measles vaccine uptake in the region during the time the cohort receives supplementation. We  
177 represent this effect by conducting three scenarios and varying measles vaccination rate in a way that the  
178 estimated coverage changes from the baseline value of 75% to 80%, and 85% among susceptible individuals  
179 who are not wasted ( $S_{No}$ ) after receiving the SQ-LNS. The increased measles vaccine uptake rate is shown



180 as  $u'$  (Fig. S1). Recent studies have shown significant improvement in children's nutritional status as a  
181 result of receiving SQ-LNS. A cluster-randomized controlled trial in Mali has shown a 29% reduction in  
182 the probability of a first wasting event.<sup>43</sup> We account for this effect in the model by parameter  $k$  (Fig. S1).  
183 Also, a recent pooled analysis of randomized controlled trials of LNS showed a 27% reduced probability  
184 of all-cause mortality.<sup>29</sup> This effect is shown as  $\mu m'$  in the model.

185 The number of measles cases is calculated as the sum of (1) the number of measles cases where  
186 40% of the population ( $1-MC$ ) do not receive the mass supplementation, and (2) the number of measles  
187 case where 60% of population ( $MC$ ) receive the mass supplementation, per unit time. The number of  
188 measles cases among wasted children, mortality due to measles among wasted children, and overall  
189 mortality among wasted children as well as their rates were calculated in a similar manner.

190  
191 **Measles-Undernutrition Model with Mass Nutritional Supplementation and Wasting Treatment**  
192 **(Scenario 3; Treatment + Prevention).** We combine scenarios 1 and 2 and we model the combined effects  
193 of wasting treatment and the community-wide mass nutritional supplementation on dynamics of measles  
194 (Fig. S2).

195  
196 **Sensitivity Analysis.** To characterize the response of model outputs to parameter variations and to  
197 identify the influential parameters, we conducted a sensitivity analysis using Latin hypercube sampling-  
198 partial rank correlation coefficient (LHS-PRCC). LHS-PRCC is an efficient sampling-based sensitivity analysis  
199 that assumes the effect of a parameter on model outputs is monotonic after removing the linear effects  
200 of all parameters except the parameter of interest.<sup>44</sup> Using LHS, we generated a matrix of 5000 sample  
201 points in the 9-dimensional unit cube (i.e., all parameters), and we explored how these parameters  
202 affected the model outcomes by using different simulated parameter sets. Next, we determined the effect

203 of each parameter on the model outcomes while averaging over the other variables by inspecting the  
204 PRCC between each of the parameters and the percent change in different outcomes.

205

## 206 **Results**

207 *Scenario 1.* We modeled a 20% prevalence of wasting among children aged 6-23 months. Treating wasted  
208 children was assumed to increase vaccination coverage among wasted children who are susceptible to  
209 measles and seeking treatment. We first assumed a coverage of therapeutic treatment for wasted  
210 children to be 5% and explored the impact of incremental increases, along with constant or increased  
211 vaccination coverage among the treated children only, upon measles infection and measles mortality  
212 among wasted children and overall mortality. An underlying assumption is that unvaccinated wasted  
213 children who receive therapeutic feeding are given the measles vaccine during week 4 of treatment, as is  
214 indicated by most treatment protocols. Rates of treated and vaccinated individuals were converted to  
215 the proportions and shown in figures. Fig. 2 shows how the combination of wasting treatment and measles  
216 vaccination coverage impacts measles outcomes. Increasing the treatment coverage of wasted children  
217 from 5% to 95%, followed by vaccination coverage of children who received treatment from 5% to 95%,  
218 leads to up to a 36% reduction in measles cases (from 2673 to 2039 per 100,000 population), and 50%  
219 reduction in measles mortality (from 125 to 75 per 100,000 population) In addition to these benefits seen  
220 for the overall population of children, the combination of wasting treatment coverage from 5% to 95%  
221 followed by measles immunization coverage from 5% to 95% reduces the measles infection and mortality  
222 among wasted children specifically by 71%, and overall mortality of wasted children by 69% (Fig. S3).

223 *Scenario 2.* Instead of therapeutic feeding of wasted children, we included mass supplementation for  
224 nutritionally at-risk populations - a less-targeted intervention with greater reach at the community-level.  
225 We assumed that 60% of the children 6-23 months old received mass supplementation with SQ-LNS at

226 health centers and hypothesized that vaccination coverage of non-wasted children ( $S_{N0}$ ) who received  
227 supplementation increased from 75% to 85%. This led to a 20% reduction in measles infection and  
228 mortality in the population and 15% reduction among wasted children. It also leads to a 10% reduction in  
229 overall mortality among wasted children.

230 *Scenario 3.* We combined Scenarios 1 and 2 and assessed the effects of therapeutic feeding of wasted  
231 children and mass supplementation of 60% of children 6-23 months old, together on measles outcomes.  
232 We varied the treatment coverage of wasted children ( $\tau$ ) between 5% to 95% as well as the vaccination  
233 coverage of treated children for wasting ( $ut$ ) between 67.5% to 95%. An increase in vaccination coverage  
234 of non-wasted children as a result of mass supplementation ( $u'$ ) from 75% to 85%, leads to a 55%  
235 reduction in measles infection (from 1652 to 1246 per 100,000 population) and 66% reduction in measles  
236 mortality (from 42 to 24 per 100,000 population) (Fig. 3). The measles infection and mortality among  
237 wasted children aged 6-23 months old were reduced by 71% and overall mortality among wasted children  
238 was reduced by 67% (Fig. S4).

239 Comparing Scenario 1 with Scenario 3 reveals that the absolute numbers of measles cases and measles  
240 mortality are lower in Scenario 3 than Scenario 1. 85% vaccination coverage of non-wasted children  
241 following mass supplementation, in addition to varying wasting treatment and vaccination coverage of  
242 children treated for wasting, leads to 36-57% and 67-77% reductions in measles infection and mortality,  
243 respectively, compared with wasting treatment only (Fig. 4 and Fig. S5). Among wasted children  
244 specifically, the infection and mortality due to measles also reduced by 74-78%, and overall mortality by  
245 56-60%, for the 85% vaccination coverage (Fig. S6 and Fig.S7).

246 If mass supplementation leads to 85% vaccination coverage of non-wasted children in both Scenarios  
247 2 and 3, comparing Scenario 3 outcomes with Scenario 2 shows 5-44% reduction in measles infection and  
248 37-70% reduction in measles mortality (Fig. 4 and Fig S.5). The variation in boxplots is produced by

249 changing the treatment coverage of wasted children as well as vaccination coverage of children who  
250 received treatment for wasting. Increasing the = treatment coverage of wasted children increases the  
251 effect size of Scenario 3 in comparison to Scenario 2 and leads to larger reduction in measles infection,  
252 measles mortality and overall mortality (Fig. S6 and Fig. S7).

253 Overall, comparing the three scenarios shows that prevention could be a more effective approach than  
254 treatment. Assuming that in the prevention scenario 75% of non-wasted children who received nutrition  
255 supplementation received vaccination, and in the treatment scenario, 75% of wasted children receive  
256 treatment, and 75% vaccination coverage of treated children, number of infected cases per 100,000  
257 wasted children reduced from 13574 (Scenario 1. treatment scenario) to 6260 (Scenario 2. prevention  
258 scenario) and to 4929 (Scenario 3. treatment + prevention scenario). Number of measles deaths per  
259 100,000 wasted children was also reduced from 1900 (treatment scenario) to 876 (prevention scenario)  
260 and to 690 (treatment + prevention scenario) (Fig. S9). Similar results were obtained for the measles  
261 infection as well as measles mortality per 100,000 population (Fig. S8). Provision of mass nutritional  
262 supplementation reduced the number of wasted children and therefore, the number of wasted infected  
263 children. This effect was much larger than the treatment effect. Scenarios 2 and 3 have similar impact  
264 sizes on measles burden, emphasizing that prevention is a more effective approach than treatment (Fig.  
265 S8 and Fig. S9).

266 These differences in model outcomes were estimated by fixing the input parameter values to best  
267 estimates informed by the literature and to represent the dynamics of measles in the Zinder region of  
268 Niger<sup>45</sup> (Table 1). However, precise quantities to inform some of the model parameters are unknown or  
269 unavailable, specifically, the increase in infectious period and increase in susceptibility to measles due  
270 to wasting ( $\eta$ ,  $\theta$ ). Simulation over a range of values for one parameter with others fixed allows us to  
271 examine the effect of Scenario 1 on multiple model outcomes. As the magnitude of wasting effects – such

272 as susceptibility effect and duration of infectious period – get larger, they result in an increase in the  
273 number of infected children, and number of deaths per 100,000 wasted children aged 6-23 months old,  
274 assuming the vaccination coverage of children who received treatment varied between 67.5% to 100%  
275 and the wasting treatment coverages varies between 5% to 100% (Fig. S10 and Fig. S11). For instance, an  
276 increase in susceptibility effect from  $\theta = 2$  to  $\theta = 4$ , leads to, on average, a 50% increases in measles  
277 infection among wasted children (from 13988 to 22085 per 100,000 wasted children aged 6-23 months  
278 old per year) (Fig. S10). Varying other parameter values such as increased measles mortality due to  
279 wasting ( $\phi$ ), or proportion who recover from wasting after measles infection ( $\delta$ ) does not lead to a  
280 noticeable difference in the simulation results for the number of infected cases. Further sensitivity  
281 analyses using the LHS-partial rank correlation coefficient (LHS-PRCC) index and generating a matrix of  
282 5000 sample points in the 9-dimensional unit cube (all parameters) indicate that  $\sigma$  (measles-induced  
283 mortality probability)  $\theta$  (susceptibility impact of measles infection) have the strongest influence on both  
284 measles infection and measles mortality outcomes (Fig. S12). In addition, mortality due to measles among  
285 wasted children aged 6-23 months old is sensitive to  $\phi$  (increased measles mortality due to wasting).

286

## 287 **Discussion**

288 Substantive barriers to improving child health in resource-limited settings include persistently high rates  
289 of undernutrition and low rates of vaccine coverage for common infections such as measles. Given the  
290 close bidirectional relationship between childhood undernutrition and infectious diseases among  
291 vulnerable populations, there may be opportunities for synergy wherein the treatment and/or prevention  
292 of one condition leads to decreased rates of the other. Our work aims to capture the dynamic interactions  
293 between undernutrition and measles, so as to estimate the impact of treatment of wasting, mass  
294 nutritional supplementation for nutritionally at-risk populations, and measles vaccine coverage on

295 measles infection and mortality.

296 No other nutrition intervention has shown such significant, simultaneous impacts on childhood  
297 malnutrition as mass supplementation with SQ-LNS from 6-18 or -23 months, including reductions in  
298 wasting, stunting, anemia, and mortality as well as improved developmental outcomes.<sup>27,28,29,30</sup> Our  
299 models demonstrate a strong effect of mass nutritional supplementation in reducing measles infection  
300 and death, as well as overall mortality, if such an intervention could be leveraged to incentivize measles  
301 vaccination uptake. Importantly, modestly increasing measles vaccination coverage by providing  
302 vaccination at the same time and location as blanket nutritional supplementation leads to sizeable  
303 reductions in measles cases and mortality well above treatment of wasting or increased vaccine uptake  
304 alone. In addition to the synergic effect, our dynamical model demonstrates the nonlinear impacts of  
305 these interventions on measles burden.

306 Our results show that mass supplementation alone and mass supplementation combined with wasting  
307 treatment have a similar effect size on reducing measles infection and mortality. Mass supplementation  
308 with SQ-LNS coupled with vaccination would likely be more cost-effective than the individual treatment  
309 of wasting alone which, in high burden countries, puts financial pressures on vulnerable and poorly  
310 resourced health systems. Future work should explore the cost-effectiveness of integrated interventions.

311 We used model parameters based on data from Niger, a nation plagued by a high burden of  
312 undernutrition, where interventions focused on the early childhood nutrition have the potential for a large  
313 impact on measles infection rates. Niger has made very little progress towards achieving international  
314 targets for decreasing stunting and wasting.<sup>46</sup> Our results suggest that mass nutritional supplementation  
315 among vulnerable populations using SQ-LNS has over twice the effect on reducing measles infection and  
316 mortality as well as overall mortality among wasted children, compared with treatment of wasted children  
317 alone, assuming both methods lead to increased vaccination coverage. Therefore, expanding the reach of

318 mass nutritional supplementation, including providing nutrition supplementation during routine  
319 immunization visits, could help Niger make progress towards lowering the incidence of wasting, as well  
320 as indirectly improve vaccination coverage. The models could be applied to other countries like Chad,  
321 Nigeria, or the Democratic Republic of Congo which have a similar burden of undernutrition as Niger but  
322 much lower measles vaccination coverage.

323 As with all models, there are some limitations to our work. Our work is theoretical, however our  
324 sensitivity analyses show that our model is robust to choice of parameter values, and thus is a call for  
325 more empirical studies. Although we account for multiple interactions between measles and  
326 undernutrition, there are several features of the complex system of measles epidemiology that were not  
327 included in the model. For instance, we did not account for any potential impact of undernutrition on  
328 measles vaccine leading to a potential delay in response to vaccine or waning of vaccine, as it is under-  
329 explored in the literature.<sup>47</sup> In addition, one of the complications that malnourished children experience  
330 following measles infection, is post-measles diarrhea which exacerbates nutrient loss.<sup>1</sup> Accounting for this  
331 could help us better identify the impacts of infection on children's nutritional status. Also, among surviving  
332 children following measles infection a certain percentage experience blindness, a certain percentage with  
333 some residual pneumonia, and quite significantly a certain percentage with a residual post-measles  
334 immunodeficiency. The reported deaths due to measles do not account for mortality from these various  
335 comorbidities.<sup>48-49</sup> In addition, assessing the potential increased pathogenicity of measles as a result of  
336 undernutrition would be useful in understanding the cyclic relationship between the two events to  
337 develop more effective interventions. More field data to constrain model parameters around the  
338 relationship between measles infection and undernutrition would allow for increasingly rigorous  
339 quantification of direct and indirect impacts of nutrition interventions. Also, nutrition interventions that  
340 led to rises in vaccination coverage were assumed to be delivered at health centers and at regular

341 intervals. It will also be important to investigate different distribution models for supplementation in  
342 order to retain contact with health personnel without placing undue burden on already overworked  
343 caretakers.

344 Given the complex interactions between undernutrition and infectious diseases, it is still challenging to  
345 recognize where and at what level specific interventions can be most effective. The large contribution of  
346 undernutrition and infection to the global burden of disease increases the importance of studying these  
347 two processes. Our study offers a more nuanced understanding of the complex interactions between  
348 measles transmission dynamics and undernutrition and helps motivate advocacy for nutrition-focused  
349 interventions based on their multidimensional impacts. This work also helps understand how the addition  
350 of nutritional status, preventive nutrition interventions, and therapeutic treatments into mathematical  
351 models of vaccine-preventable diseases can better explain increased susceptibility to infection despite  
352 achieving certain vaccine coverage levels. This model also has implications for understanding other  
353 indirect benefits of increased care-seeking due to engagement with the health system for nutrition-based  
354 interventions. When considering how health systems with limited budgets should spend their money to  
355 achieve maximal benefit, we have shown here that leveraging mass nutritional supplementation as a  
356 contact point with the health system to even modestly increase measles vaccination coverage has a  
357 synergistic benefit beyond either intervention alone. Such a double impact could be even more important  
358 in areas where both malnutrition and measles are rising because of conflict, climate shocks, and  
359 disruptions from the Covid-19 pandemic.<sup>50,51</sup>

360

### 361 **Acknowledgments**

362 The funders had no role in study design, data collection, data analysis, the decision to publish, or  
363 preparation of the manuscript. The content of this article is solely the responsibility of the authors and



364 does not necessarily represent the official views of their respective employers or funders.

365

### 366 **Financial Support**

367 No source of funding.

368

### 369 **Competing Interest Statement**

370 Kevin P.Q. Phelan, The Alliance for International Medical Action (ALIMA) serves on the Social Purposes

371 Advisory Commission of Nutriset, a main producer of lipid-based nutrient supplement products. Other

372 authors declare no conflict of interest.

### 373 **Authors' Contributions**

374 IT, KPQP contributed to the concept, design and interpretation of the analysis. NN and LS and JLP

375 developed the model. NN conducted the analysis. KAM, JLP, GCC, and BMA contributed to the model

376 revision. NN, LS, APO, KAM, JLP, GCC, BMA, IT, KPQP wrote the manuscript.

377

### 378 **Co-Author Contact Information**

379 **Navideh Noori**; Institute for Disease Modeling, Global Health Division, Bill and Melinda Gates

380 Foundation, 500 5th Ave N, Seattle, WA, 98109, USA, [navideh.noori@gatesfoundation.org](mailto:navideh.noori@gatesfoundation.org)

381 **Laura A. Skrip**; School of Public Health, University of Liberia, 1000 Monrovia, 10 Liberia,

382 [skripla@ul.edu.lr](mailto:skripla@ul.edu.lr)

383 **Assaf P. Oron**; Institute for Health Metrics and Evaluation, University of Washington, Seattle, WA,

384 98195, USA, [assaf@uw.edu](mailto:assaf@uw.edu)

385 **Kevin A. McCarthy**; Institute for Disease Modeling, Global Health Division, Bill and Melinda Gates

386 Foundation, 500 5th Ave N, Seattle, WA, 98109, USA, [kevin.mccarthy@gatesfoundation.org](mailto:kevin.mccarthy@gatesfoundation.org)

387 **Joshua L. Proctor**; Institute for Disease Modeling, Global Health Division, Bill and Melinda Gates  
388 Foundation, 500 5th Ave N, Seattle, WA, 98109, USA, [josh.proctor@gatesfoundation.org](mailto:josh.proctor@gatesfoundation.org)  
389 **Guillaume Chabot-Couture**; Institute for Disease Modeling, Global Health Division, Bill and Melinda  
390 Gates Foundation, 500 5th Ave N, Seattle, WA, 98109, USA, [guillaume.chabot-](mailto:guillaume.chabot-couture@gatesfoundation.org)  
391 [couture@gatesfoundation.org](mailto:couture@gatesfoundation.org)  
392 **Benjamin M. Althouse**; Information School, University of Washington, Seattle, WA, 98104, USA;  
393 Department of Biology, New Mexico State University, Las Cruces, NM, 88003, USA, [bma85@uw.edu](mailto:bma85@uw.edu)  
394 **Kevin P.Q. Phelan**; The Alliance for International Medical Action (ALIMA), Paris, 75011, France,  
395 [kevin.phelan@alima.ngo](mailto:kevin.phelan@alima.ngo)  
396 **Indi Trehan**; Department of Pediatrics, Global Health, and Epidemiology, University of Washington,  
397 Seattle, WA, 98104, USA, [itrehan@uw.edu](mailto:itrehan@uw.edu)  
398  
399  
400  
401  
402  
403  
404  
405  
406  
407  
408  
409  
410  
411

412 **References**

- 413 1. Humphries DL, Scott ME, Vermund SH, 2021. Nutrition and infectious diseases, shifting the  
414 clinical paradigm. Springer Nature Switzerland AG.
- 415 2. Scrimshaw NS, 2003. Historical concepts of interactions, synergism and antagonism between  
416 nutrition and infection. *J Nutr* 133, 316–321.
- 417 3. Schaible UE, Kaufmann SH, 2007. Malnutrition and infection: Complex mechanisms and global  
418 impacts. *PLoS Med* 4, 0806–0812.
- 419 4. Walson JL, Berkley JA, 2018. The impact of malnutrition on childhood infections. *Curr Opin*  
420 *Infect Dis* 31, 231–236.
- 421 5. Checkley W, Buckley G, Gilman RH, Assis AM, Guerrant RL, Morris SS, Mølbak K, Valentiner-  
422 Branth P, Lanata CF, Black RE, 2008. Multi-country analysis of the effects of diarrhoea on  
423 childhood stunting. *Int J Epidemiol* 37, 816–830.
- 424 6. Dewey KG, Mayers DR, 2011. Early child growth: How do nutrition and infection interact?  
425 *Matern Child Nutr* 7, 129–142.
- 426 7. Black RE, Allen LH, Bhutta ZA, Caulfield LE, de Onis M, Ezzati M, Mathers C, Rivera J, 2008.  
427 Maternal and child undernutrition: global and regional exposures and health consequences.  
428 *The Lancet* 371, 243–260.
- 429 8. Katona P, Katona-Apte J, 2008. The interaction between nutrition and infection. *Clin Infect Dis*  
430 46, 1582–1588.
- 431 9. Bhutta ZA, Berkley JA, Bandsma RHJ, Kerac M, Trehan I, Briend A 2017 Severe childhood  
432 malnutrition. *Nat. reviews. Dis. Primers.* 3, 17067.
- 433 10. Black RE et al, 2013. Maternal and child undernutrition and overweight in low-income and  
434 middle-income countries. *The Lancet* 382, 427–451 (2013).

- 435 11. Bourke CD, Berkley JA, Prendergast AJ, 2016. Immune dysfunction as a cause and consequence  
436 of malnutrition. *Trends Immunol* 37, 386–398.
- 437 12. Oxlade O, Huang CHC, Murray M, 2015. Estimating the impact of reducing under-nutrition on  
438 the tuberculosis epidemic in the central eastern states of India: A dynamic modeling study.  
439 *PLoS One* 8, 1–15.
- 440 13. Hove-Musekwa SD, Nyabadza F, Chiyaka ch, Das P, Tripathi A, Mukandavire Z, 2011. Modelling and  
441 analysis of the effects of malnutrition in the spread of cholera. *Math Comput Model* 53,  
442 1583–1595.
- 443 14. Coutinho BP, Oriá RB, Vieira CM, Sevilleja JE, Warren CA, Maciel JG, Thompson MR, Pinkerton  
444 RC, Lima AA, Guerrant RL, 2008. Cryptosporidium infection causes undernutrition and,  
445 conversely, weanling undernutrition intensifies infection. *J Parasitol* 94, 1225–1232.
- 446 15. Roche JK, Cabel A, Sevilleja J, Nataro J, Guerrant RL, 2010. Enteroaggregative Escherichia coli  
447 (EAEC) impairs growth while malnutrition worsens EAEC infection: A novel murine model of  
448 the infection malnutrition cycle. *J Infect Dis* 202, 506–514.
- 449 16. Costa LB, Noronha FJ, Roche JK, Sevilleja JE, Warren CA, Oriá R, Lima A, Guerrant RL, 2012.  
450 Novel in vitro and in vivo models and potential new therapeutics to break the vicious cycle  
451 of cryptosporidium infection and malnutrition. *J Infect Dis* 205, 1464–1471 (2012).
- 452 17. Bartelt LA, Roche J, Kolling G, Bolick D, Noronha F, Naylor C, Hoffman P, Warren C, Singer S,  
453 Guerrant R, 2013. Persistent G. lamblia impairs growth in a murine malnutrition model. *J*  
454 *Clin Invest* 123, 2672–2684.
- 455 18. Ibrahim MK, Zambruni M, Melby CL, Melby PC, 2017. Impact of childhood malnutrition on host  
456 defense and infection. *Clin Microbiol Rev* 30, 919–971.
- 457 19. Fenn B, 2014. Malnutrition in Humanitarian Emergencies. *Midwifery* 4.

- 458 20. Koster FT, Curlin GC, Aziz KN, Haque A, 1981. Synergistic impact of measles and diarrhoea on  
459 nutrition and mortality in Bangladesh. *Bull World Heal Organ* 59, 901–908.
- 460 21. Smedman L, Lindeberg A, Jeppsson O, Zetterstrom R, 1983. Nutritional status and measles: A  
461 community study in Guinea-Bissau. *Annals Trop Paediatr* 3, 169–176.
- 462 22. Morley D, 1969. Severe measles in the tropics. *Br Med J* 1, 297–300.
- 463 23. Morley DC, 1974. Measles in the developing world. *Proc Royal Soc Med* 67, 1112–1115.
- 464 24. Scrimshaw NS, Salomon JB, Bruch HA, Gordon JE, 1966. Studies of diarrheal disease in central  
465 America VIII. measles, diarrhea, and nutritional deficiency in rural Guatemala. *Am J Trop*  
466 *Med Hyg* 15, 625–631.
- 467 25. Banerjee AV, Duflo E, Glennerster R, Kothari D, 2010. Improving immunisation coverage in rural  
468 India: Clustered randomised controlled evaluation of immunisation campaigns with and  
469 without incentives. *BMJ* 340, 1291.
- 470 26. Sato R, 2021. Association between uptake of selected vaccines and undernutrition among  
471 Nigerian children. *Hum Vaccin Immunother* 1–9. DOI: 10.1080/21645515.2021.1880860
- 472 27. Keats EC, Das JK, Salam RA, Lassi ZS, Imdad A, Black RE, Bhutta ZA, 2021. Effective interventions to  
473 address maternal and child malnutrition: an update of the evidence. *Lancet Child Adolesc Health*  
474 5, 367-384.
- 475 28. Dewey, KG, CP Stewart, KR Wessells, EL Prado and CD Arnold (2021). Small-quantity lipid-based  
476 nutrient supplements for the prevention of child malnutrition and promotion of healthy  
477 development: overview of individual participant data meta-analysis and programmatic  
478 implications. *Am J Clin Nutr* 114(Suppl 1): 3S-14S.
- 479 29. Stewart CP, Wessells KR, Arnold ChD, Huybregts L, Ashorn P, Beccquey E, Humphrey JH, Dewey KG,  
480 2020. Lipid-based nutrient supplements and all-cause mortality in children 6-24 months of

- 481 age: A meta-analysis of randomized controlled trials. *Am J Clin Nutr* 111, 207–218.
- 482 30. Prado EL *et al* 2021. Small-quantity lipid-based nutrient supplements for children age 6-24 months:  
483 a systematic review and individual participant data meta-analysis of effects on developmental  
484 outcomes and effect modifiers. *Am J Clin Nutr* 114(Suppl 1): 43S-67S.
- 485 31. IF of Red Cross, 2020. RC Societies, Case study Tackling malnutrition in Niger.
- 486 32. Niger Ministry of Public Health, Department of Nutrition, 2021. National Nutrition and  
487 Retrospective Mortality Survey, SMART Report. December 2021. (in French).
- 488 33. UNICEF/WHO/World Bank, 2021. Joint Child Malnutrition Estimates Expanded Database,  
489 Stunting, Wasting and Overweight.
- 490 34. World Health Organization Regional Office for Africa, 2022. Weekly bulletin on outbreaks and  
491 other emergencies, Week 17: 18 – 24 April 2022, (World Health Organization), Technical Report  
492 April.
- 493 35. Blake A, Djibo A, Guindo O, Bharti N, 2020. Investigating persistent measles dynamics in Niger and  
494 associations with rainfall. *J. R. Soc. Interface*.172020048020200480.  
495 <https://royalsocietypublishing.org/doi/10.1098/rsif.2020.0480>
- 496 36. Oumarou M, Kanta MI, Le Duc G, 2011. The new role of Nigerian medical NGOs in treating SAM.
- 497 37. World Bank World Development Indicators. 2016 Birth rate, crude (per 1,000 people) - Niger  
498 Data.
- 499 38. World Bank World Development Indicators, 2016. Mortality rate, infant (per 1,000 live births) -  
500 Niger Data.
- 501 39. Stobaugh HC, Mayberry A, McGrath M, Bahwere P, Zagre NM, Manary MJ, Black R, Lelijveld N,  
502 2019. Relapse after severe acute malnutrition: A systematic literature review and secondary  
503 data analysis. *Matern Child Nutr* 15, 1–12.

- 504 40. WHO, 2020. WHO vaccine-preventable diseases: monitoring system.
- 505 41. The DHS Program, 2018. Quality information to plan, monitor and improve population, health,  
506 and nutrition programs.
- 507 42. Morley D, Woodland M, Martin WJ, 1963. Measles in Nigerian children. *J Hyg* 61, 115–134.
- 508 43. Huybregts L, Le Port A, Becquey E, Zongrone A, Barba FM, Rawat R, Leroy JL, Ruel MT, 2019.  
509 Impact on child acute malnutrition of integrating small-quantity lipid-based nutrient  
510 supplements into community-level screening for acute malnutrition: A cluster-randomized  
511 controlled trial in Mali. *PLoS Med* 16, 1–3.
- 512 44. Wu J, Dhingra R, Gambhir M, Remais JV, 2013. Sensitivity analysis of infectious disease models:  
513 methods, advances and their application. *J R Soc Interface* 10.
- 514 45. Ferrari MJ, Grais RF, Bharti N, Conlan AJK, Bjørnstad ON, Wolfson LJ, Guerin PJ, Djibo A,  
515 Grenfell BT, 2008. The dynamics of measles in sub-Saharan Africa. *Nature* 451, 679–684.
- 516 46. Osgood-Zimmerman A *et al*, 2018. Mapping child growth failure in Africa between 2000 and  
517 2015. *Nature* 555, 41–47.
- 518 47. Prendergast AJ, 2015 Malnutrition and vaccination in developing countries. *Philos. Trans. R. Soc.*  
519 *Lond. B. Biol. Sci.* 370.
- 520 48. Laksono BM *et al*, 2018. Studies into the mechanism of measles-associated immune suppression  
521 during a measles outbreak in the Netherlands. *Nat Commun* 9, 4944.
- 522 49. Mina MJ, Metcalf CJE, de Swart RL, Osterhaus ADME, Grenfell BT. 2015 Long-term measles-  
523 induced immunomodulation increase overall childhood infectious disease mortality. *Science*.  
524 348(6235):694-9.
- 525 50. UNICEF, 2022. Severe wasting: an overlooked child emergency. UNICEF Child Alert New York.  
526 <https://www.unicef.org/child-alert/severe-wasting>.

- 527 51. UNICEF and World Health Organization, 2022. UNICEF and WHO warn of perfect storm of  
528 conditions for measles outbreaks, affecting children. 27 April 2022 Joint News Release New  
529 York/Geneva. [https://www.who.int/news/item/27-04-2022-  
530 unicef-and-who-warn-of-perfect-storm--of-conditions-for-measles-outbreaks--affecting-children.](https://www.who.int/news/item/27-04-2022-unicef-and-who-warn-of-perfect-storm--of-conditions-for-measles-outbreaks--affecting-children)
- 531 52. Kerac M, Frison S, Connell N, Page B, McGrath KM, 2019. Informing the management of acute  
532 malnutrition in infants aged under 6 months (MAMI): Risk factor analysis using nationally-  
533 representative demographic health survey secondary data. *PeerJ*. doi: 10.7717/peerj.5848
- 534 53. Isanaka S, Nombela N, Djibo A, Poupard M, Van Beckhoven D, Gaboulaud V, Guerin PJ, Grais  
535 RF, 2009. Effect of preventive supplementation with ready-to-use- therapeutic food on the  
536 nutritional status, mortality and morbidity of children 6 to 60 months in Niger: a cluster  
537 randomized trial. *JAMA* 301, 277–285.
- 538 54. Besada D *et al*, 2016. Niger’s child survival success, contributing factors and challenges to  
539 sustainability: A retrospective analysis. *PLoS ONE* 11, 1–18.
- 540 55. Guerra FM, Bolotin S, Lim G, Heffernan J, Deeks SL, Li Y, Crowcroft NS, 2017. The basic  
541 reproduction number (R0) of measles: a systematic review. *The Lancet Infect Dis* 17, e420–  
542 e428.
- 543 56. Ferrari MJ, Djibo A, Grais RF, Bharti N, Grenfell BT, Bjørnstad ON, 2010. Rural-urban gradient in  
544 seasonal forcing of measles transmission in Niger. *Proc Royal Soc B: Biol Sci* 277, 2775–2782.
- 545 57. Portnoy A, Jit M, Ferrari MJ, Hanson M, Brenzel L, Verguet S, 2019. Estimates of case-fatality ratios  
546 of measles in low-income and middle-income countries: A systematic review and modelling  
547 analysis. *The Lancet Glob Health* 7, e472–e481.
- 548 58. J. Dossetor J, Whittle HC, Greenwood BM, 1977. Persistent measles infection in malnourished  
549 children. *Br Med J* 1, 1633–1635.

550



551 **Table 1.** Parameter values used in the dynamical measles-undernutrition model.

| Parameters                                                          | Symbol     | Value                                                                                | Reference |
|---------------------------------------------------------------------|------------|--------------------------------------------------------------------------------------|-----------|
| <b>Demographic and undernutrition parameters</b>                    |            |                                                                                      |           |
| Population size                                                     | $N_0$      | 100,000                                                                              | -         |
| Population of surviving infants under-6 months old                  | $B$        | 5,000                                                                                | -         |
| Aging rate of age group 6-23 months                                 | $\alpha$   | $1/(6+23)/2 \sim 1/15 \text{ month}^{-1}$                                            | -         |
| Under-2 mortality rate                                              | $\mu$      | 2.05 deaths per 10,000 per day $\sim 0.075$ per year                                 | (36)      |
| Proportion of infants under-6 months who are wasted                 | $\omega$   | 20%                                                                                  | (52)      |
| Wasting mortality rate                                              | $\mu_m$    | $0.016 + 0.075$                                                                      | (36, 53)  |
| Wasting treatment coverage                                          | $\tau$     | variable (defined as a rate)                                                         | (54)      |
| Relapse rate                                                        | $\chi$     | 2% at 1 month post-discharge                                                         | (39)      |
| <b>Measles parameters</b>                                           |            |                                                                                      |           |
| Measles basic reproductive ratio                                    | $R_0$      | 15                                                                                   | (55)      |
| Seasonality amplitude of measles                                    | $b_1$      | 0.6                                                                                  | (45)      |
| Force of infection                                                  | $\lambda$  | See Supplementary Material                                                           | -         |
| Measles infectious period                                           | $1/\gamma$ | 14 days                                                                              | (45)      |
| Immigration rate of measles                                         | $\epsilon$ | 10 infected per year                                                                 | (56)      |
| Vaccination coverage of measles                                     | $v$        | Defined as a rate to be equivalent to 75%                                            | (40)      |
| Vaccination coverage of wasted children                             | $uv$       | Defined as a rate to be equivalent to 67.5%                                          | (41)      |
| Vaccination coverage of children treated for wasting                | $vt$       | variable (defined as a rate)                                                         | -         |
| Measles case fatality rate                                          | $\sigma$   | 2.8%                                                                                 | (57)      |
| Increased measles mortality due to wasting                          | $\phi$     | $(6+3.7)/2 \sim 5$                                                                   | (7)       |
| Increased susceptibility to measles infection due to wasting        | $\theta$   | 2                                                                                    | Assumed   |
| Proportion of children who become wasted after measles infection    | $H$        | 4%                                                                                   | (24, 42)  |
| Increased susceptibility to measles due to subsequent wasting event | $\zeta$    | 0                                                                                    | Assumed   |
| Measles-associated wasting mortality                                | $\rho$     | 44%                                                                                  | (42)      |
| Infectious period extension for wasted children*                    | $\eta$     | Assuming infectious period among wasted children is 20 days, $\eta = 14/20 \sim 0.7$ | (58)      |
| Proportion of wasted infected children who recover from wasting     | $\delta$   | 20%                                                                                  | Assumed   |
| <b>Mass nutritional supplementation parameters</b>                  |            |                                                                                      |           |
| Mass supplementation coverage                                       | $MC$       | 60%                                                                                  | Assumed   |
| Measles vaccine coverage after mass supplementation                 | $v'$       | 75%, 80%, 85%                                                                        | Assumed   |
| Reduced all-cause mortality due to mass supplementation             | $\mu m'$   | $0.075(1-0.27) + 0.016$                                                              | (29)      |
| Reduced probability of first AM event due to mass supplementation   | $K$        | 29%                                                                                  | (43)      |

552 \*Measles latent and infectious periods are approximately 6 and 8 days, respectively. Infectiousness starts about 4 days before the onset of rash and lasts ~ 4 days after the onset of rash.  
553

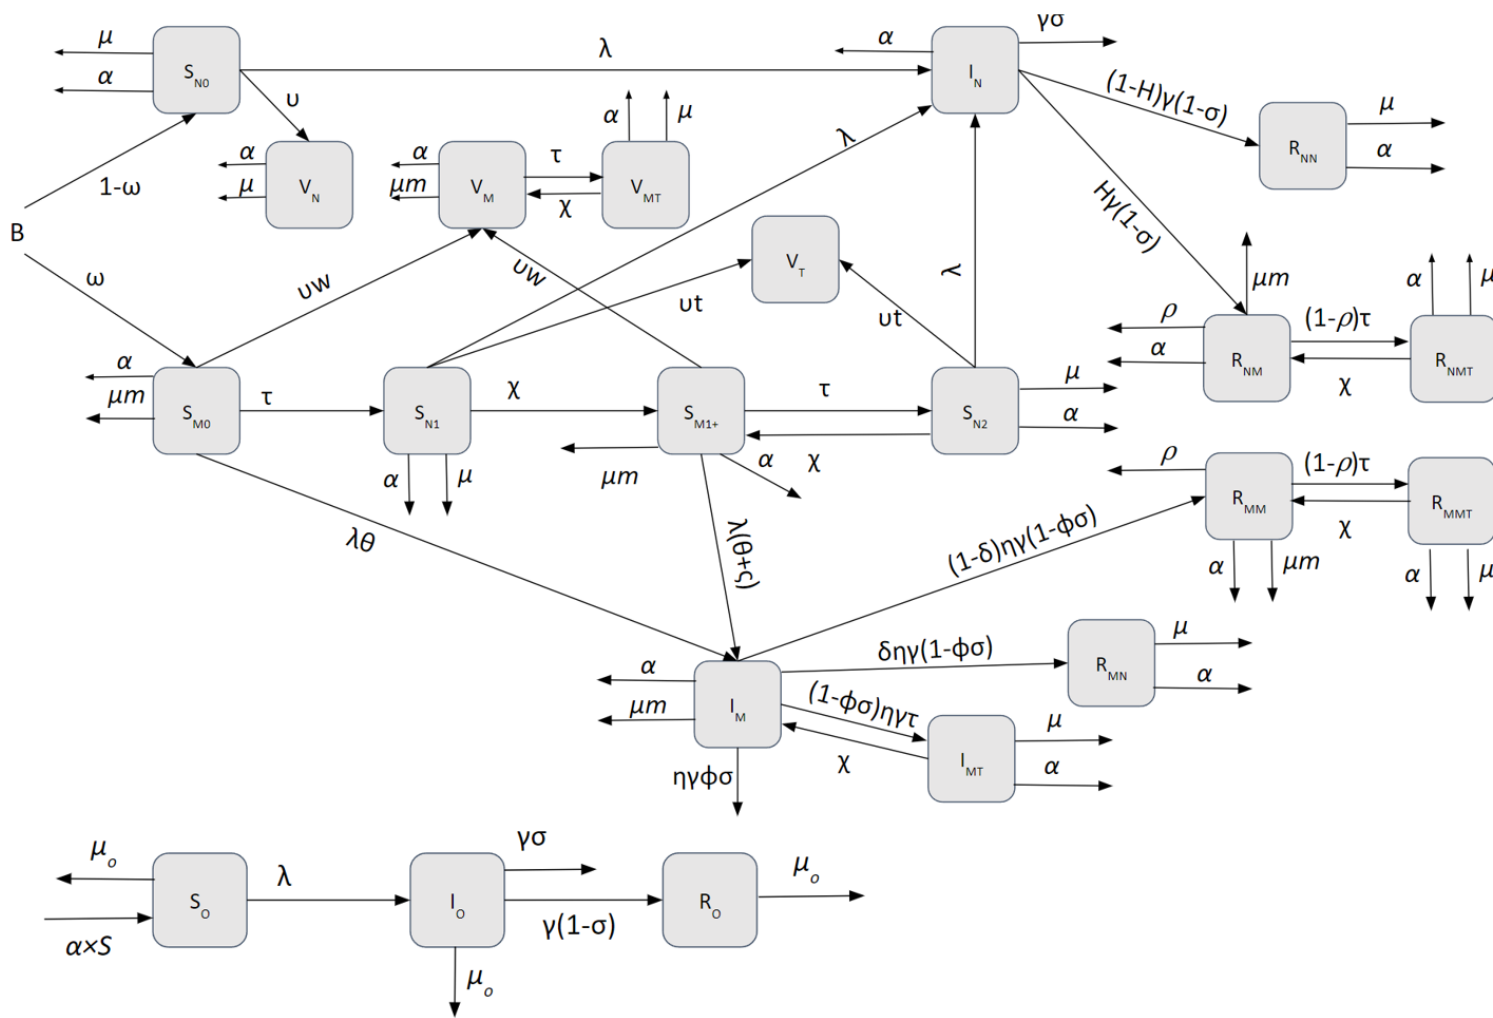

554  
 555 **Figure 1.** Schematic of measles-overnutrition model with no mass nutritional supplementation (Scenario 1).

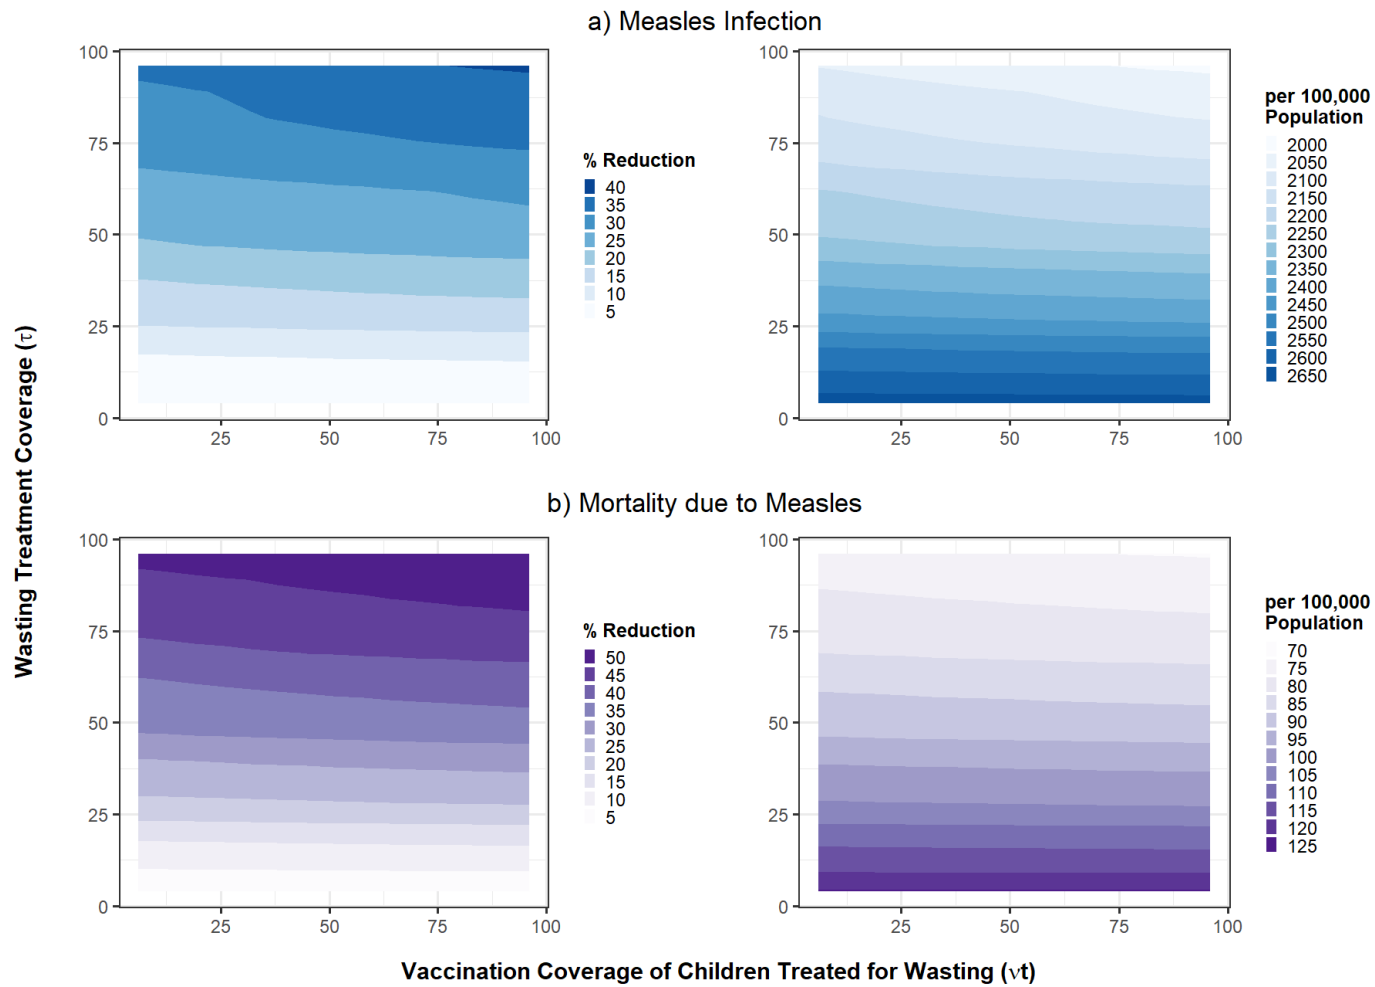

556

557 **Figure 2.** Combined impact of treatment of wasted children and their vaccination coverage (Scenario 1) on reduction in a) measles cases and b)

558 mortality due to measles. The outcomes are shown as percentage reduction as well as incidence per 100,000 population.

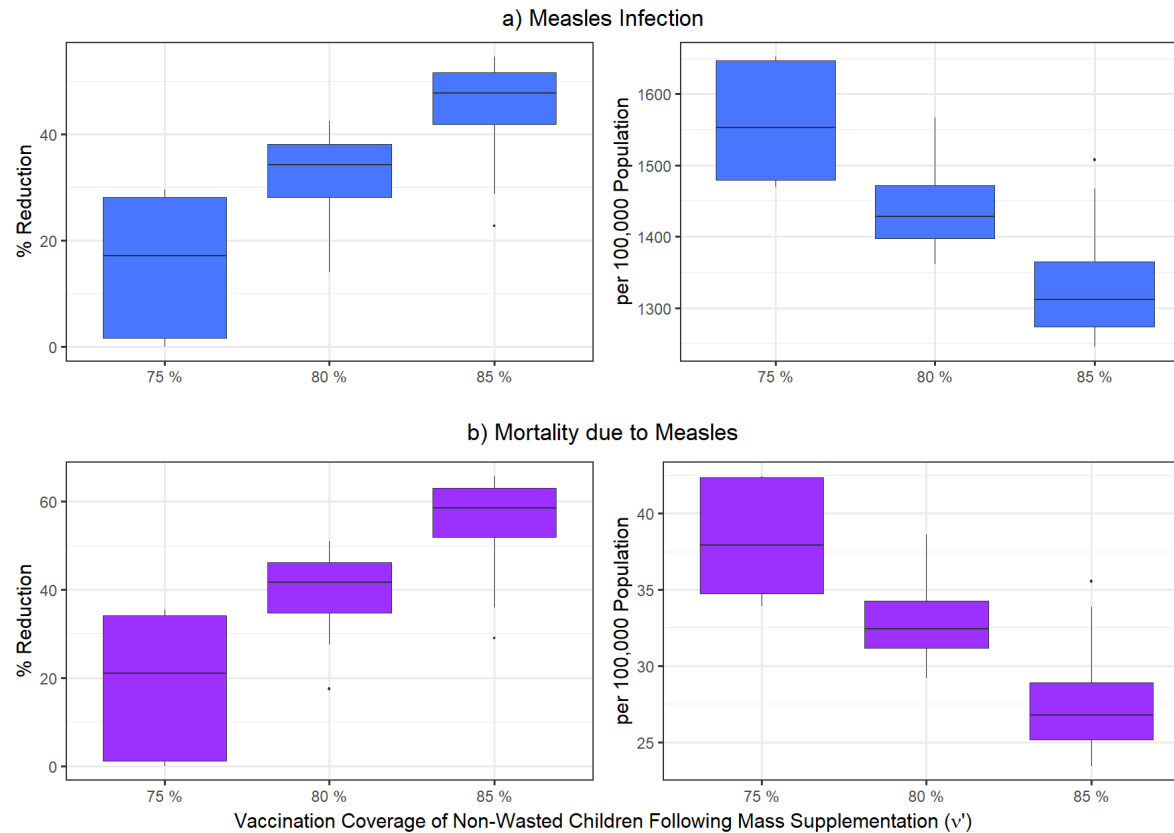

559

560 **Figure 3.** Impacts of mass nutritional supplementation and wasting treatment (scenario 3), on reducing a) measles infection (blue) and b)  
 561 mortality due to measles (purple), assuming the vaccination coverage of non-wasted children ( $v'$ ) after receiving the SQ-LNS changes from  
 562 its baseline value of 75% to 80%, and 85%. The variation in boxplots is produced by changing the treatment coverage of wasted children  
 563 ( $\tau$ ) between 5% to 95%, and the vaccination coverage of wasted children between 67.5% to 95%.

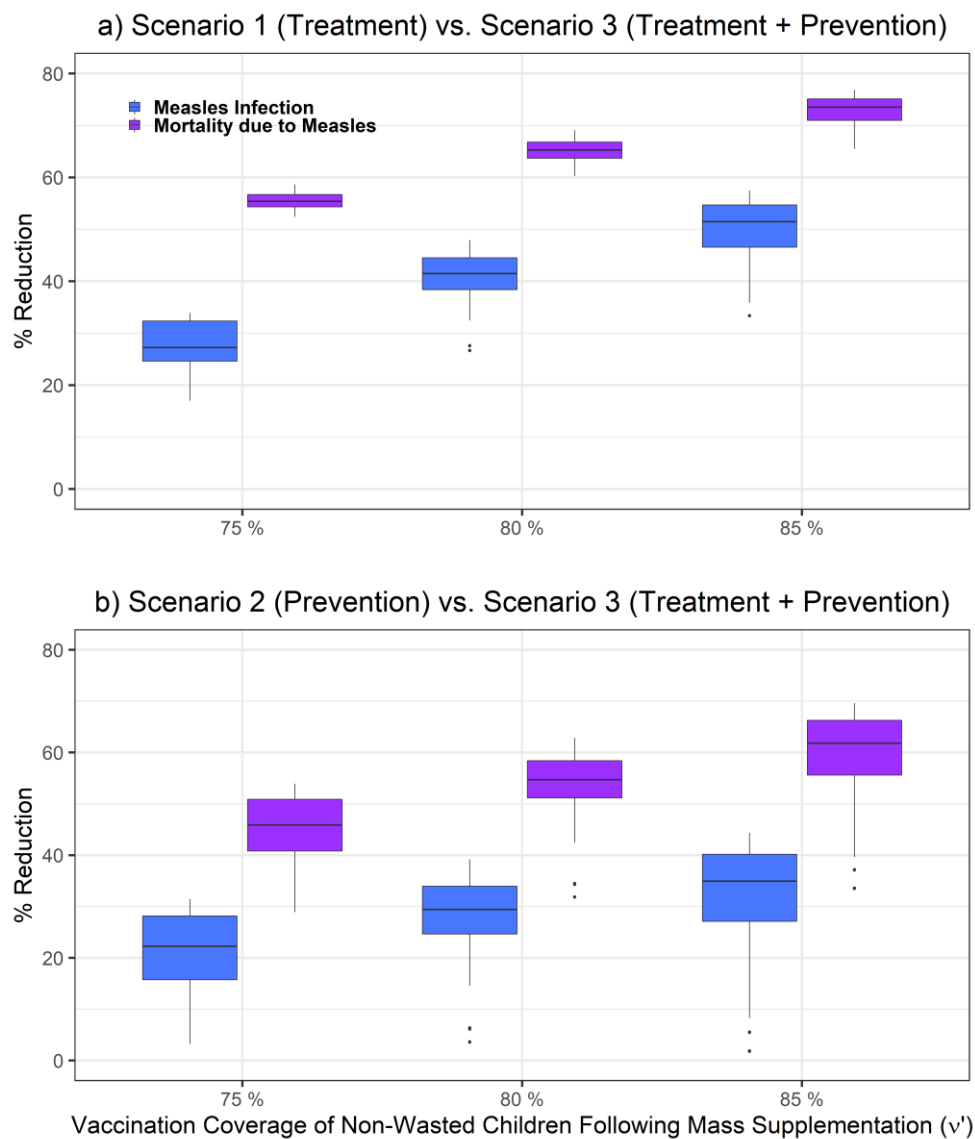

564

565 **Figure 4.** Difference between a) wasting treatment (Scenario 1) and mass nutritional  
566 supplementation and wasting treatment (Scenario 3) and b) mass nutritional  
567 supplementation (Scenario 2) and scenario 3, in reducing measles infection (blue) and  
568 mortality due to measles (purple), assuming the vaccination coverage of non-wasted  
569 children ( $v'$ ) after receiving SQ-LNS varies to 75%, 80%, and 85%. The variation in boxplots is  
570 produced by changing the treatment coverage of wasted children ( $\tau$ ) between 5% to 95%,  
571 and the vaccination coverage of wasted children between 67.5% to 95%.
